# Supplementary figures and images for: Hypothalamic POMC deficiency increases circulating adiponectin despite obesity
Source: PubMed Central journal article supplement — Mol Metab. 2020 Feb 7;35:100957. doi: 10.1016/j.molmet.2020.01.021 (PMC7082555; doi:10.1016/j.molmet.2020.01.021), 2020-02-07

**A** 9-Week Obese Female, 129S6/SvEvTac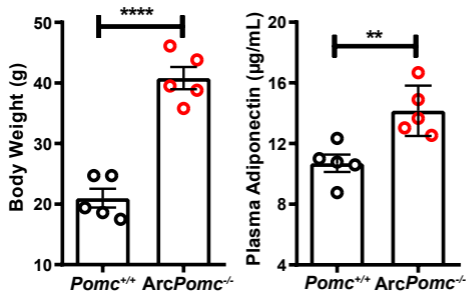**B** 24-Week Weight-Matched Male, C57BL/6J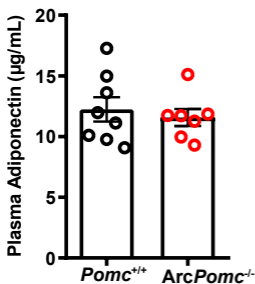**C** 9-Week Pair-Fed Female, C57BL/6J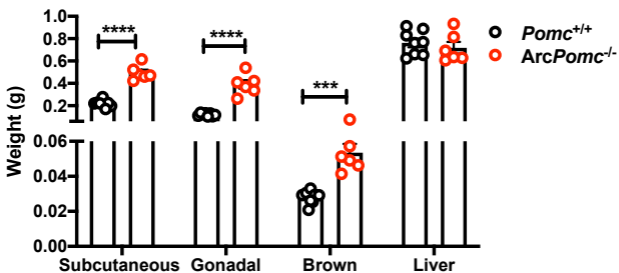

Supplement: mmc1.pdf [file mmc1.pdf]

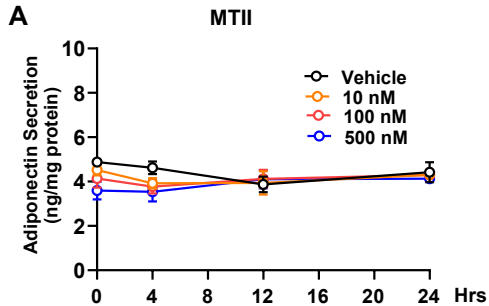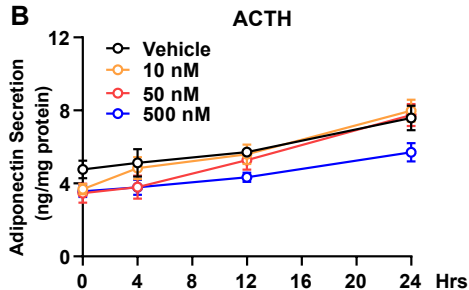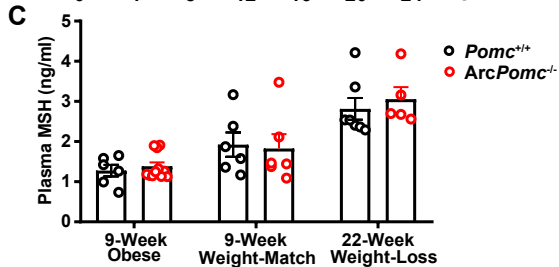

Supplement: mmc2.pdf [file mmc2.pdf]

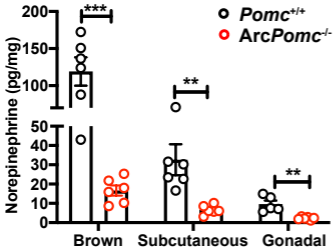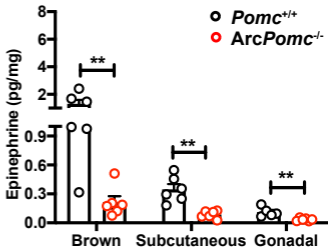

Supplement: mmc3.pdf [file mmc3.pdf]
